# Supplementary material for: Inferring the ancestry of parents and grandparents from genetic data
Source: bioRxiv or medRxiv preprint supplement (doi:10.1101/308494), 2020-05-27
Supplement: Supplementary file [file 308494-1.pdf]

# Supplemental Methods for “Inferring the ancestry of parents and grandparents from genetic data”

## Supplemental Figures

***Figure S1: Impact of data trimming threshold,  $d_f$ , on amount of data and inference accuracy.***

(A) The number of SNPs remaining after trimming.

(B) The mean error of parent and grandparent admixture inference.

Simulation parameters:  $\mu = 10^{-6}$ ,  $\rho = 5 \times 10^{-6}$ ,  $nsam = 2,000$ ,  $L = 10^6$

***Figure S2: Varying recombination rate using 10 chromosomes.***

As we simulate genomes with longer length, the increase of recombination rate does not lead to the significant decrease in mean error. That is, the mean error asymptotes as recombination rate increases.

***Figure S3: Running time with various number of SNPs using one thread.***

***Figure S4: Ancestry of two haplotypes with or without phasing errors.***

(A) Ancestry with phasing error.

(B) Ancestry without phasing error.  $H_i$  denotes the ancestry for haplotype  $H_i$ . Ancestry consists of blocks in white and black, where white denotes ancestral population A and black denotes ancestral population B.

## Supplemental Tables

***Table S1: The mean and variance (in unit of %) of difference between the admixture proportions of sampled individuals and the average of parental or grandparental admixture proportions.***

***Table S2: Pearson correlation coefficient for admixture proportion estimates from ADMIXTURE, RFmix, and average of parents from PedMix.***

***Table S3: Compare the effects of LD-pruning and frequency-based pruning on inference accuracy.***

LD: results with LD-pruning. F-prune: results with frequency-based pruning.

## Supplemental Methods

### Two strategies of data trimming

#### Frequency-based pruning

Large number of SNPs result in long computational time. We note that SNPs that have similar allele frequencies in the two source populations are less informative. Here, we use two simple thresholds to filter out less-informative SNPs to enhance the performance of our method.

1. Delete the SNPs that have zero, or close to zero, recombination fractions with their immediate neighboring SNPs.
2. Choose an allele frequency difference threshold  $d_f$ . Then delete SNPs with population allele frequency difference between the two ancestral populations less than  $d_f$ .

#### LD pruning

Before LD-pruning, rare variants with combined minor allele frequencies in the two ancestral populations lower than  $f$  are removed. We use the correlation coefficient of linkage disequilibrium,  $r^2$ , in the ancestral populations to measure the level of linkage disequilibrium between two SNP sites. We scan through the SNPs sequentially. If  $r^2 > c$  (the default value of  $c$  is 0.1) between the current SNP and the previous SNP within a window of length  $W = 10Kbp$ , in either of the two ancestral populations, then the current SNP is removed.

## Preprocessing for phasing error

Phasing error results in a switching between two haplotypes, which is similar to how recombination affects haplotypes. The difference is that it only occurs in the current generation. Phasing error adds more noise in our model, especially when phasing error occurs much more frequently than recombination. Empirically, it is known that the recombination rate for humans is approximately  $10^{-8}$  per generation between two adjacent base pairs. In most current data (e.g., haplotypes from the 1000 Genomes Project), phasing error occurs as frequently as once every 50 kb, which is three orders of magnitude larger than the recombination rate. So it is necessary to reduce the effect of phasing error. For this, we preprocess the haplotypes to reduce phasing error. Here are the steps that we use to remove likely phasing error for two extant haplotypes.

1. With the allele frequencies of two ancestral populations at each site, we first make a rough estimate of ancestry for the genotype  $G$ . For example, suppose the allele frequencies (of allele 1) for the two ancestral populations  $A$  and  $B$  are 0.1 and 0.8 respectively. It is more likely that two alleles (0, 1) at a SNP site have ancestry as  $(A, B)$ , and (1, 1) have ancestry  $(B, B)$ .
2. For each site of genotype  $G$ , we assign a “dominating ancestry”. A dominating ancestry is an ancestry with one of these four possible pairs,  $(A, A)$ ,  $(A, B)$ ,  $(B, A)$ , or  $(B, B)$ , that appears most frequently within a region of certain length. Here we use the estimated number of SNPs between two phasing errors as the region length. We view  $(A, B)$  and  $(B, A)$  as type 1 ancestry,  $(A, A)$  as type 0, and  $(B, B)$  as type 2.
3. In the region that has the dominated ancestral type 1, we switch the two haplotypes if its ancestral painting  $(A, B)$  or  $(B, A)$  is different from its previous positions.

With the assignment of dominating ancestry, the two haplotypes phased from the genotype  $G$  can be viewed as blocks of different dominating ancestry. For example, Supplemental Fig S4 shows the ancestry for two haplotypes with black blocks indicating ancestry  $A$  and white blocks indicating ancestry  $B$ . Supplemental Fig S4 (A) provides an example on the ancestry of two phased haplotypes. Here we divide the whole region into three types of sub-regions: type 2 for  $(B, B)$ , type 1 for  $(A, B)$  or  $(B, A)$  and type 0 for  $(A, A)$ . Note that in type 0 and 2 regions, it is not obvious how to detect and fix phasing errors (but also not necessary). In a type 1 region, when we detect

switch-overs between ancestry  $(A, B)$  and  $(B, A)$  within the region, we consider such switch-overs as the phasing error position and switch the suffix of two haplotypes from this point to make it consistent. This is because the probability that two recombination events happen at exactly the same place is  $10^{-8} \times 10^{-8} = 10^{-16}$ , which is much smaller than the phasing error probability of  $10^{-5}$ .

We note that the three-steps strategy described above does not remove all phasing errors. In fact, it may even add switching errors in some rare cases. However, our simulations show that this procedure can reduce a significant amount of obvious phasing errors and help to reduce the noise of data (Figure 4). Without preprocessing, phasing error rate for genotypes is approximately 1 over 50kb, which is  $p_p = 0.00002$ . Preprocessing for phasing errors reduces approximately 2/3 phasing errors for admixed individuals. One can use a smaller phasing error rate  $p_p = 0.0000066$  in PedMix after preprocessing.

### Expected accuracy by random guess

In order to provide a baseline for the evaluation of the inference accuracy, we use a Bayesian model based random guess for estimating ancestry admixture proportions. Here we assume that the mean of admixture proportions of the ancestors is the admixture proportion of the focal individual. We treat each SNP position independently in the following. Given a genotype of a focal individual, we first sample ancestry for each SNP site based on the allele frequency of the SNP in the two ancestral populations. Ancestry of an allele (of some individual) refers to which of the two ancestral populations this allele originates from. With the sampled ancestry of this focal individual, we sample ancestry for his/her ancestors (parents, grandparents, or great grandparents) following the posterior distribution. For example, the posterior probability of the parental ancestry is given in Equation S1.

$$p(A_1, A_2|A_0) = \frac{p(A_0|A_1, A_2)p(A_1)p(A_2)}{p(A_0)} \quad (\text{S1})$$

Here  $A_0$  is the sampled ancestry for one haplotype of the focal individual at a SNP site.  $A_1$  and  $A_2$  are the sampled ancestry of the two haplotypes from a single parent (which provides the allele for the focal individual). With the Mendelian segregation laws,  $p(A_1) = p(A_2) = \frac{1}{2}$  are prior

probabilities. The grandparental posterior probability  $p(A_1, A_2, A_3, A_4|A_0)$  and great grandparental posterior probability  $p(A_1, A_2, A_3, A_4, A_5, A_6, A_7, A_8|A_0)$  can be derived similarly. The estimate by the random guess is then computed using the sampled ancestry of each ancestor.

Note that random guess doesn't use information from admixture tracts and their lengths. For example, given the focal individual's genotype of pedigree CCCY with no phasing errors (see the Results Section ), The sampled ancestry of parents and grandparents all present  $\sim 50\%$  admixture proportions. Given a genotype with no phasing error, random guess can still collect information for parents but fails to collect useful information for ancestors in grandparents and great grandparents. When adding phasing errors to genotype, random guess performs even worse in parents. For example, given the focal individual's genotype of pedigree CCYY (see the Results Section ), random guess gets  $\sim 50\%$  ancestry for each parents while two parents are actually 100% and 0%.

## Inference of ancestral admixture proportions with composite likelihood

The inference framework in PedMix takes advantage of the distribution of admixture tracts. Here, an admixture tract refers to a segment of the genome where the ancestral origin remains the same (i.e., coming from the same ancestral population). However, parental admixture proportions can be estimated simply from the distribution of genotype frequencies using composite likelihood as follows. Let  $M = (m_1, m_2)$  be the admixture proportions of the two ancestors, then the composite likelihood is defined as the product of likelihoods in individual sites:

$$p(G|M) = \prod_i p(G_i|M) \tag{S2}$$

The sampling probability for each site,  $p(G_i|M)$ , is calculated as a product of allele frequencies in the two parents using standard methods as follows. The probability of sampling an allele of type  $j$  from a parent with admixture proportion  $M$  and  $1 - M$  from the population A and the population B respectively is  $Mf_A + (1 - M)f_B$  if the allele frequencies of the allele  $j$  at the site  $i$  in the two populations are  $f_A$  and  $f_B$  respectively. We may infer admixture proportions by maximizing the composite likelihood. This can be done, for example, by performing a grid search over  $M$ .

This composite likelihood based method is computationally much faster than PedMix because it ignores linkage disequilibrium (LD). However, the method does not generalize to grandparents

or more ancient ancestors as such models are not identifiable in the composite likelihood setting. To see this, let  $M = (m_1, m_2, m_3, m_4)$  be the admixture proportions of the four grandparents, with  $(m_1, m_2)$  being from one grandparental couple, and  $(m_3, m_4)$  from the other. Let the allele  $j$  be one of the two alleles of the genotype  $G_i$ . Without loss of generality, we further suppose this allele is from the parent (parent 1) descending from the grandparents with admixture proportions  $m_1$  and  $m_2$ . The sampling probability,  $p(G_i|M)$ , is then obtained as a sum of products of terms like  $p(j, \text{allele from parent 1} | m_1, m_2)$  by summing over both possible assignments of alleles to parents. Now,

$$\begin{aligned} p(j, \text{allele from parent 1} | m_1, m_2) &= \frac{1}{2} \left[ \frac{1}{2} (m_1 f_A + (1 - m_1) f_B) + \frac{1}{2} (m_2 f_A + (1 - m_2) f_B) \right] \\ &= \frac{1}{4} ((m_1 + m_2) f_A + (2 - (m_1 + m_2)) f_B) \end{aligned} \quad (\text{S3})$$

Equation S3 shows that  $m_1$  and  $m_2$  in  $p(j, \text{allele from parent 1} | m_1, m_2)$  appear only as the sum  $m_1 + m_2$ . For any genotype  $G_i$ , the composite likelihood  $p(G|M)$  only contains information about  $m_1 + m_2$  but not  $m_1$  and  $m_2$  individually. Therefore,  $m_1$  and  $m_2$  are not separately identifiable in the composite likelihood model.

## User guideline for using PedMix

Here is a list of user inputs needed by PedMix.

1. Phased haplotypes for the extant individual for whom we are to infer the admixture proportions of his or her ancestors. Haplotypes can be given in segments (or chromosomes), where segments are assumed to be independent.
2. For each SNP, allele frequencies of two ancestral populations.
3. Recombination fractions between adjacent SNPs along the haplotypes.

Often the input haplotypes may contain too many SNPs or less informative SNPs. In this case, the user may need to apply various data trimming techniques. We suggest to use frequency-based pruning with  $d_f = 0.5$ .

## Details in comparison to ADMIXTURE, RFmix, and ANCESTOR

### Verification

To verify that the average admixture proportions of ancestors of an individual provides a good estimate of the admixture proportion of focal individual, we simulate a sample of 100 individuals and compare the average values of admixture proportions of their ancestors with the admixture proportions of themselves. The sampled individuals are drawn either  $g = 10$  generations or  $g = 5$  generations after the time of admixture. The absolute difference (the error) between the true admixture proportions of one individual of the current generation and the average admixture proportions of his/her ancestors in the  $K^{th}$  generation is computed as  $|m^0 - \frac{1}{2^K} \sum_{1 \leq j \leq 2^K} m^j|$ , and we report the mean and variance of this as the mean error and the variance in the error among individuals (Supplemental Table S1). Here  $m^0$  is the true admixture proportion of the sampled individual.  $m^j$  is the true admixture proportion of the sampled individual ancestor  $j$  in the  $K^{th}$  generation.

We find that the average ancestral admixture proportions indeed approximately match the admixture proportions of the individual, as the mean differences are fairly close to 0. Several aspects of the results in Supplemental Table S1 are worth attention. First, the variance in the error increases with more ancestors. Second, the variance tends to be larger for individuals from generations that are closer to the admixture event. This is because when the time since admixture is short, the individuals tend to have more diverse admixture proportions than individuals from a generation that is more distant from the admixture event and is thus well mixed.

### ADMIXTURE, RFmix, and ANCESTOR setting

We apply ADMIXTURE and RFmix to infer the current generation admixture proportions on the same datasets. As suggested by ADMIXTURE, genotypes are preprocessed with LD pruning with parameters  $c = 0.1$  and  $W = 10Kbp$ . To achieve the best performance in ADMIXTURE and RFmix, we also include all ancestral genotypes from the two ancestral populations along with 20 individuals from the admixed population to these two tools. That is, ADMIXTURE is run on “supervised mode”. The number of ancestral populations  $K$  is set to 2. A “.bed” file is generated by PLINK. For real data, we use 170 haplotypes from CEU and 176 haplotypes from YRI as two ancestral populations in ADMIXTURE and RFmix to estimate admixture proportions

for 61 genotypes from ASW. Here we compute the Pearson Correlation coefficient for admixture proportions estimates from ADMIXTURE, RFmix, and the average over parents by PedMix over 61 individuals in ASW population. The estimates by ADMIXTURE and RFmix show the highest correlation (0.9975, see Supplemental Table S2). The estimates by PedMix (average over parents) also have a high correlation with ADMIXTURE (0.9954) and RFmix (0.9945).

ANCESTOR infers the admixture proportions of parents of a focal individual given the ancestry state of each position in the genome. ANCESTOR allows phasing error in genotypes and can be used for multiple ancestries. In this paper, we use the ancestry inferred by RFmix from the Viterbi decoding as the ancestry states in ANCESTOR.

## **Supplemental results for data trimming**

### **The effect of frequency-based pruning**

To investigate the effect of frequency-based pruning, we simulate haplotypes for a small region of length  $10^6bp$  with 545,302 SNPs. And we investigate different values of the previously explained allele frequency thresholds,  $d_f$ . Notice that trimming results in a substantial reduction in mean error, particularly for inferences of admixture proportions in grandparents. However, when the trimming threshold is too large, an increase in the mean error is observed due to the reduction in number of SNPs. In this case, the optimal trimming threshold appears to be around  $d_f = 0.5$  (see Supplemental Fig S1).

### **Comparing two pruning strategies**

We further investigate the effect of frequency-based pruning and LD-pruning in a more extreme setting,  $L = 1.36 \times 10^8$ ,  $\rho = 5 \times 10^{-8}$  and  $t = 1.0$ . The reason for simulating haplotypes with shorter length is to reduce the computing time. However, short haplotypes usually lead to reduced accuracy and insignificant differences between the trimming or non-trimming settings. We thus use larger recombination rates. This is similar to using longer genomes and allows much faster computation. Larger population split time is used in order to obtain SNPs with more diverse allele frequencies so that the effect of threshold values of frequency-based trimming can be better evaluated.

There are about 800K SNPs simulated for this chromosome. We compare the two strategies in



two cases. First, LD-pruning is done without removing rare variants, resulting in 450K SNPs left to use. Second, we remove rare variants (i.e., SNPs with a frequency  $f = 0.06$  combined in the two populations, resulting in approximately 450K and 150K SNPs, respectively). We compare with the two settings of frequency-based pruning, with threshold of  $d_f = 0.05$  and  $d_f = 0.5$ , resulting in 400K and 130K, respectively (see Supplemental Table S3). Our results show that frequency-based pruning appears to perform better than LD-pruning in our test.

## Running Time

We now evaluate the computational efficiency of PedMix. PedMix is written in *C++*. To make the algorithm run faster, we not only adopt the divide-and-conquer strategy, but also make it run with multi-threads. Multi-threading can be useful when there are multiple chromosomes in the data. The best performance occurs when there are  $k$  chromosomes with similar number of SNPs using  $k$  threads in parallel. However, since it is an optimization problem, the convergence time is uncertain. In general, the running time increases exponentially with the number of generations inferred. Here we report the average running time of grandparent inference for 10 individuals and fix the number of threads to 1 as we increase the number of SNPs from 5,000 to 550,000 (see Supplemental Fig S3). As expected, we observe a clear increase in time when we use more SNPs.

For comparison, ADMIXTURE, RFmix, and PedMix are run on same datasets in the Results Section. To estimate admixture proportions over 20 individuals, ADMIXTURE takes 1.5 min using 20 threads, while RFmix takes 21.5 mins using one thread. On average, PedMix takes 3 mins for parental inference and 2.5 hrs for grandparental inference using 11 threads for each individual. ADMIXTURE and RFmix run much faster than PedMix. This is because the computation performed by ADMIXTURE and RFmix and the parameters to estimate are very different with those of PedMix.

Table S1: *The mean and variance (in unit of %) of difference between the admixture proportions of sampled individuals and the average of parental or grandparental admixture proportions.*

| Error (in %)            |          | $g = 10$ | $g = 5$ |
|-------------------------|----------|----------|---------|
| Parental inference      | mean     | 0.567    | 0.151   |
|                         | variance | 3.98     | 5.45    |
| Grandparental inference | mean     | 0.151    | 0.271   |
|                         | variance | 5.946    | 10.08   |

Table S2: *Pearson correlation coefficient for admixture proportion estimates from ADMIXTURE, RFmix, and average of parents from PedMix.*

| correlation coefficient  | ADMIXTURE | RFmix  | PedMix (ave. of parents) |
|--------------------------|-----------|--------|--------------------------|
| ADMIXTURE                | 1         | 0.9975 | 0.9954                   |
| RFmix                    | 0.9975    | 1      | 0.9945                   |
| PedMix (ave. of parents) | 0.9954    | 0.9945 | 1                        |

Table S3: *Compare the effects of LD-pruning and frequency-based pruning on inference accuracy. LD: results with LD-pruning. F-prune: results with frequency-based pruning.*

| Inference error (%) | LD (450K) | F-prune (400K) | LD(150K) | F-prune (130K) |
|---------------------|-----------|----------------|----------|----------------|
| parents             | 10.30     | 10.70          | 7.27     | 6.67           |
| grandparents        | 15.66     | 15.51          | 11.17    | 7.39           |

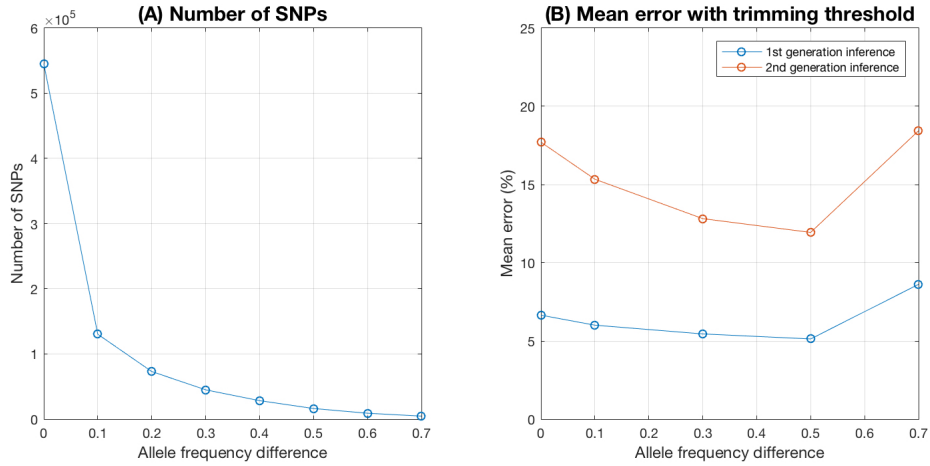

Figure S1: Impact of data trimming threshold,  $d_f$ , on amount of data and inference accuracy. (A) The number of SNPs remaining after trimming. (B) The mean error of parent and grandparent admixture inference. Simulation parameters:  $\mu = 10^{-6}$ ,  $\rho = 5 \times 10^{-6}$ ,  $nsam = 2,000$ ,  $L = 10^6$

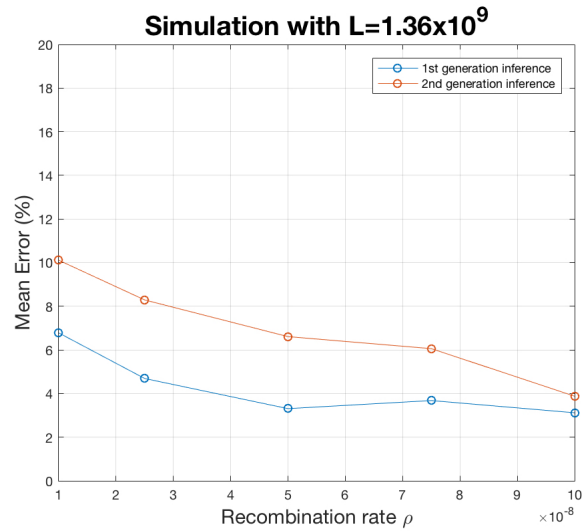

Figure S2: Varying recombination rate using 10 chromosomes. As we simulate genomes with longer length, the increase of recombination rate does not lead to the significant decrease in mean error. That is, the mean error asymptotes as recombination rate increases.

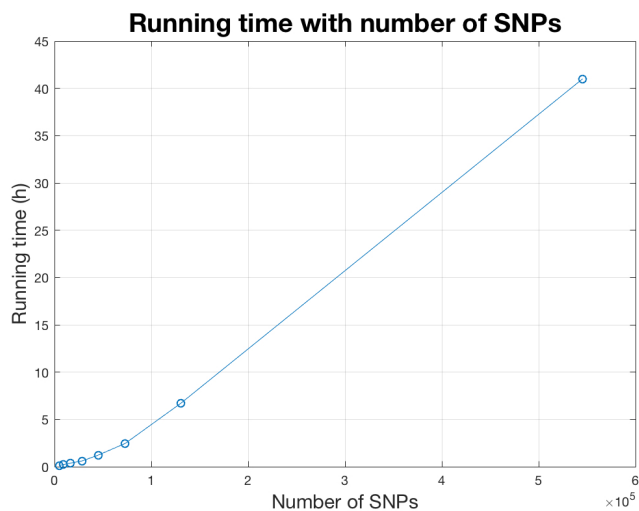

Figure S3: *Running time with various number of SNPs using one thread.*

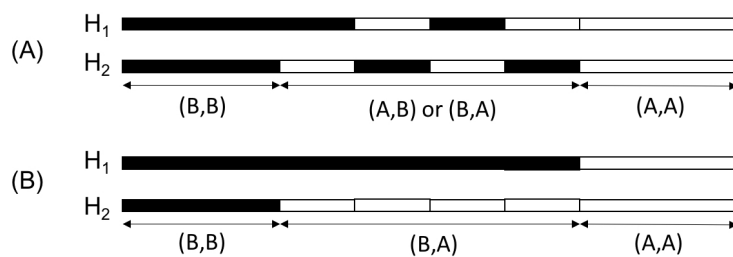

Figure S4: *Ancestry of two haplotypes with or without phasing errors. (A) Ancestry with phasing error. (B) Ancestry without phasing error.  $H_i$  denotes the ancestry for haplotype  $H_i$ . Ancestry consists of blocks in white and black, where white denotes ancestral population A and black denotes ancestral population B.*
